# Supplementary material for: Structural alterations of the intestinal epithelial barrier in Parkinson’s disease
Source: PubMed Central journal article supplement (PMC4353469; doi:10.1186/s40478-015-0196-0), 2015-03-10

# Supplementary figure 2

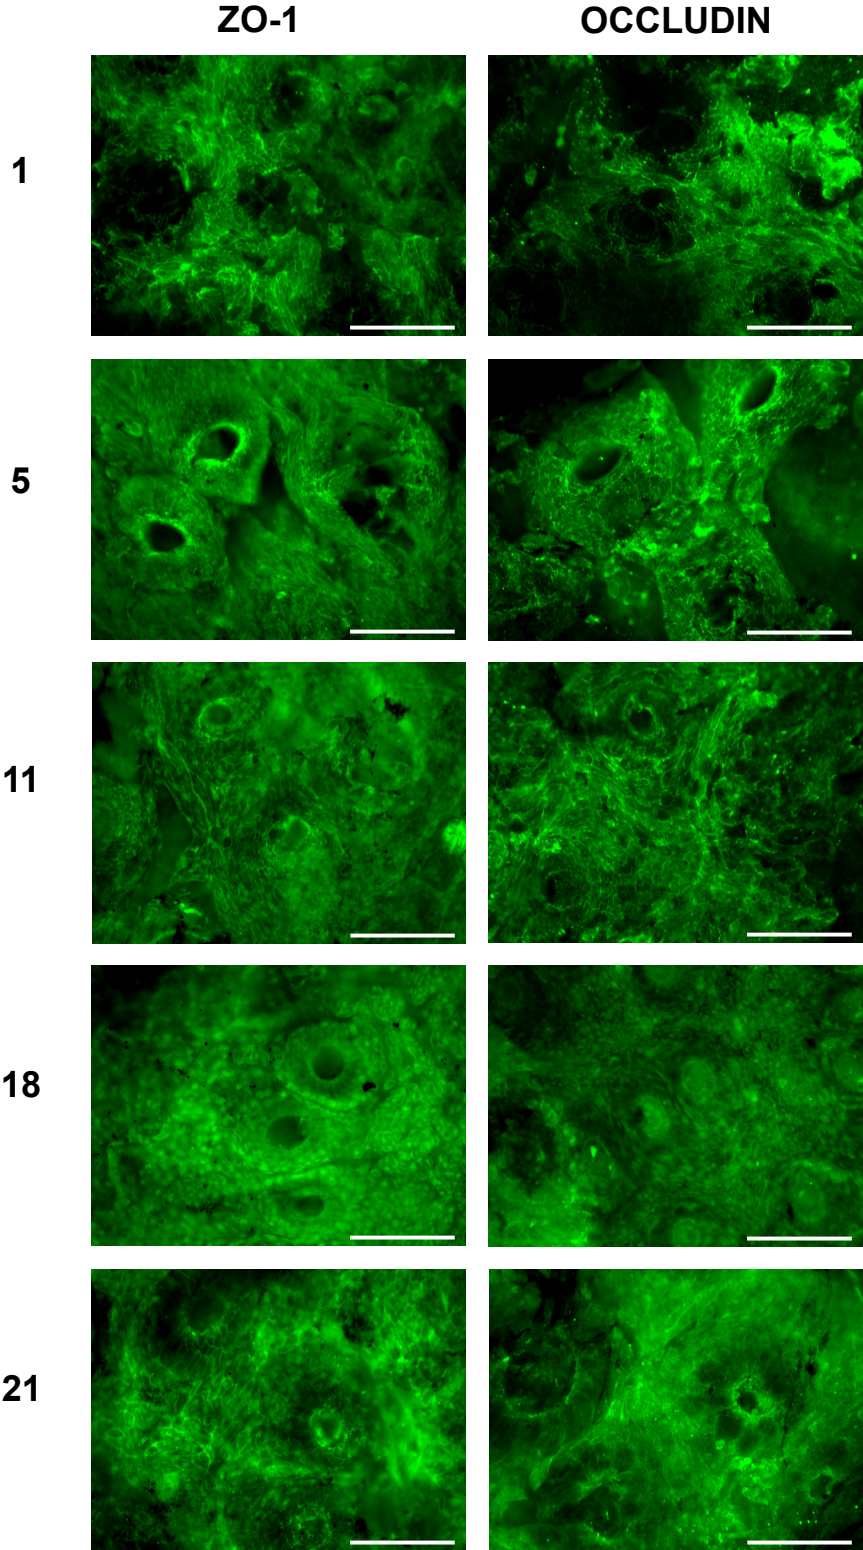

Supplement: 40478_2015_196_MOESM2_ESM.pdf [file 40478_2015_196_MOESM2_ESM.pdf]
